# Supplementary material for: In-silico performance, validation, and modeling of the Nanostring Banff Human Organ transplant gene panel using archival data from human kidney transplants
Source: PubMed Central journal article supplement (PMC7977303; doi:10.1186/s12920-021-00891-5), 2021-03-19
Supplement: 12920_2021_891_MOESM1_ESM.pdf [file 12920_2021_891_MOESM1_ESM.pdf]

**SUPPLEMENTARY TABLE 1  
CLASSIFICATION PARAMETERS**

**CLASSIFICATION PARAMETERS**

**Pycaret Modules**

**Setup:**

remove\_multicollinearity=True  
multicollinearity\_threshold= 0.95  
feature\_selection=True  
feature\_interaction=True  
fix\_imbalance=True  
K-fold=10 (default)  
Compare\_models=Classifiers  
Create\_model  
Evaluate\_model

**Pycaret Classifiers Tested:**

Ada Boost Classifier  
CatBoost Classifier  
Decision Tree Classifier  
Extra Trees Classifier  
Extreme Gradient Boosting  
Gaussian Process Classifier  
Gradient Boosting Classifier  
K Nearest Neighbour  
Light Gradient Boosting  
Linear Discriminant Analysis  
Logistic Regression  
Multi Level Perceptron  
Naives Bayes  
Quadratic Discriminant Analysis  
Random Forest Classifier  
Ridge Classifier  
SVM – Linear Kernel  
SVM – Radial Kernel

**JMP14.2**

General Regression  
Multinomial Logistic Regression  
Adaptive elastic net, penalty for colinearity  
K-fold=10  
Repeat with active effects until no parameters are dropped

**Bayesia Lab 9.0**

Discretization Bin =2, Perturbed Tree\*  
Supervised Learning = Tree Augmented Naïve Bayes\*  
Kulback-Leibler Divergence  
Resampling K Fold =10  
\*Empirically Determined by Minimal Descriptive Length
