# Supplementary material for: In-silico performance, validation, and modeling of the Nanostring Banff Human Organ transplant gene panel using archival data from human kidney transplants
Source: PubMed Central journal article supplement (PMC7977303; doi:10.1186/s12920-021-00891-5), 2021-03-19
Supplement: 12920_2021_891_MOESM2_ESM.pdf [file 12920_2021_891_MOESM2_ESM.pdf]

## SUPPLEMENTARY TABLE 2

| Pre-Batch                       |          | Post-Batch                      |          |
|---------------------------------|----------|---------------------------------|----------|
| Model                           | Accuracy | Model                           | Accuracy |
| Linear Discriminant Analysis    | 0.72     | Logistic Regression             | 0.76     |
| SVM - Linear Kernel             | 0.72     | Linear Discriminant Analysis    | 0.76     |
| Logistic Regression             | 0.71     | Light Gradient Boosting Machine | 0.76     |
| Extreme Gradient Boosting       | 0.71     | Extra Trees Classifier          | 0.76     |
| Extra Trees Classifier          | 0.71     | Exgtreme Gradnient Boosting     | 0.76     |
| Light Gradient Boosting Machine | 0.70     | Ridge Classifier                | 0.75     |
| Random Forest Classifier        | 0.70     | K Neighbors Classifier          | 0.75     |
| Gradient Boosting Classifier    | 0.70     | Random Forest Classifier        | 0.74     |
| Ridge Classifier                | 0.70     | Gradient Boosting Classifier    | 0.74     |
| K Neighbors Classifier          | 0.69     | SVM - Linear Kernel             | 0.74     |
| Ada Boost Classifier            | 0.67     | Ada Boost Classifier            | 0.72     |
| Naïve Bayes                     | 0.55     | Naïve Bayes                     | 0.60     |
