# Supplementary material for: In-silico performance, validation, and modeling of the Nanostring Banff Human Organ transplant gene panel using archival data from human kidney transplants
Source: PubMed Central journal article supplement (PMC7977303; doi:10.1186/s12920-021-00891-5), 2021-03-19
Supplement: 12920_2021_891_MOESM3_ESM.pdf [file 12920_2021_891_MOESM3_ESM.pdf]

SUPPLEMENTARY TABLE 3

| PC               | DIAGNOSIS | Estimate | -LOG10 FDRPV |
|------------------|-----------|----------|--------------|
| B CELLS          | ABMR      | 0.06     | 0.3          |
| CD4 CELLS        | ABMR      | 0.03     | 0.2          |
| CD8 CELLS        | ABMR      | 0.12     | 0.9          |
| CHECK POINT      | ABMR      | -0.01    | 0.1          |
| CHEMOKINES       | ABMR      | -0.05    | 0.3          |
| CYTOKINES        | ABMR      | -0.01    | 0.0          |
| CYTOTOXICITY     | ABMR      | 0.25     | 2.4          |
| ENDOTHELIUM      | ABMR      | 0.81     | 22.0         |
| MACROPHAGES      | ABMR      | 0.19     | 2.1          |
| NK CELLS         | ABMR      | 0.05     | 0.2          |
| PBPC1            | ABMR      | 0.24     | 3.7          |
| PBPC2            | ABMR      | 0.26     | 2.6          |
| PBPC3            | ABMR      | -0.07    | 0.3          |
| PBPC4            | ABMR      | 0.47     | 9.5          |
| PBPC5            | ABMR      | -0.55    | 11.6         |
| PBPC6            | ABMR      | 0.16     | 1.7          |
| PBPC7            | ABMR      | -0.12    | 0.8          |
| PBPC8            | ABMR      | -0.89    | 28.7         |
| PLASMA CELLS     | ABMR      | 0.19     | 1.8          |
| TFHC             | ABMR      | 0.09     | 0.6          |
| TGFB Path        | ABMR      | 0.34     | 5.6          |
| TH1              | ABMR      | 0.27     | 3.7          |
| TH17             | ABMR      | 0.13     | 1.1          |
| TH2              | ABMR      | 0.24     | 2.2          |
| TNF Path         | ABMR      | 0.37     | 6.1          |
| TUBULES          | ABMR      | -0.06    | 0.4          |
| TYPE1 INTERFERON | ABMR      | 0.36     | 5.7          |
| TYPE2 INTERFERON | ABMR      | 0.32     | 5.8          |
| UPC1             | ABMR      | 0.17     | 2.9          |
| UPC2             | ABMR      | 0.25     | 2.7          |
| UPC3             | ABMR      | -0.05    | 0.3          |
| UPC4             | ABMR      | 0.67     | 19.6         |
| UPC5             | ABMR      | -0.28    | 6.8          |
| UPC6             | ABMR      | -0.42    | 6.6          |
| UPC7             | ABMR      | 0.35     | 6.4          |
| B CELLS          | AKI       | -0.76    | 23.3         |
| CD4 CELLS        | AKI       | -0.90    | 30.5         |
| CD8 CELLS        | AKI       | -1.02    | 38.6         |
| CHECK POINT      | AKI       | -0.81    | 25.0         |
| CHEMOKINES       | AKI       | -0.42    | 9.0          |
| CYTOKINES        | AKI       | -0.51    | 11.7         |
| CYTOTOXICITY     | AKI       | 0.12     | 0.8          |
| ENDOTHELIUM      | AKI       | -0.54    | 10.4         |
| MACROPHAGES      | AKI       | -0.66    | 19.7         |
| NK CELLS         | AKI       | -0.15    | 1.0          |
| PBPC1            | AKI       | -0.92    | 41.3         |
| PBPC2            | AKI       | -0.59    | 10.9         |
| PBPC3            | AKI       | 0.92     | 27.7         |
| PBPC4            | AKI       | 0.18     | 1.8          |
| PBPC5            | AKI       | 0.74     | 19.9         |
| PBPC6            | AKI       | -0.29    | 4.4          |
| PBPC7            | AKI       | 0.16     | 1.2          |
| PBPC8            | AKI       | -0.13    | 1.0          |
| PLASMA CELLS     | AKI       | -0.78    | 23.0         |
| TFHC             | AKI       | -0.75    | 22.6         |
| TGFB Path        | AKI       | -0.45    | 9.4          |
| TH1              | AKI       | -0.75    | 23.6         |
| TH17             | AKI       | -0.67    | 18.5         |
| TH2              | AKI       | -0.54    | 9.1          |
| TNF Path         | AKI       | -0.64    | 16.4         |
| TUBULES          | AKI       | -0.09    | 0.6          |
| TYPE1 INTERFERON | AKI       | -0.73    | 20.4         |
| TYPE2 INTERFERON | AKI       | -0.73    | 25.8         |
| UPC1             | AKI       | -0.74    | 39.5         |
| UPC2             | AKI       | -0.38    | 5.5          |
| UPC3             | AKI       | 0.99     | 38.5         |
| UPC4             | AKI       | -0.02    | 0.1          |
| UPC5             | AKI       | -0.60    | 26.9         |
| UPC6             | AKI       | 0.46     | 7.9          |
| UPC7             | AKI       | -1.21    | 60.3         |
| B CELLS          | MIXED     | 0.90     | 31.4         |
| CD4 CELLS        | MIXED     | 0.91     | 31.3         |
| CD8 CELLS        | MIXED     | 1.02     | 38.9         |

A

|                  |             |       |      |
|------------------|-------------|-------|------|
| CHECK POINT      | MIXED       | 0.88  | 29.2 |
| CHEMOKINES       | MIXED       | 0.81  | 30.3 |
| CYTOKINES        | MIXED       | 0.85  | 29.5 |
| CYTOTOXICITY     | MIXED       | 0.98  | 28.6 |
| ENDOTHELIUM      | MIXED       | 1.18  | 43.5 |
| MACROPHAGES      | MIXED       | 1.06  | 45.4 |
| NK CELLS         | MIXED       | 0.96  | 23.9 |
| PBPC1            | MIXED       | 1.01  | 48.6 |
| PBPC2            | MIXED       | -0.08 | 0.4  |
| PBPC3            | MIXED       | -0.29 | 3.4  |
| PBPC4            | MIXED       | 0.34  | 5.2  |
| PBPC5            | MIXED       | -0.25 | 2.8  |
| PBPC6            | MIXED       | 0.09  | 0.6  |
| PBPC7            | MIXED       | -0.16 | 1.3  |
| PBPC8            | MIXED       | -0.44 | 8.1  |
| PLASMA CELLS     | MIXED       | 1.01  | 35.9 |
| TFHC             | MIXED       | 0.92  | 32.6 |
| TGFB Path        | MIXED       | 0.42  | 8.0  |
| TH1              | MIXED       | 1.13  | 48.0 |
| TH17             | MIXED       | 0.87  | 29.3 |
| TH2              | MIXED       | 0.98  | 27.6 |
| TNF Path         | MIXED       | 1.13  | 45.2 |
| TUBULES          | MIXED       | -0.63 | 17.4 |
| TYPE1 INTERFERON | MIXED       | 0.87  | 27.8 |
| TYPE2 INTERFERON | MIXED       | 1.15  | 57.0 |
| UPC1             | MIXED       | 0.79  | 44.4 |
| UPC2             | MIXED       | -0.17 | 1.4  |
| UPC3             | MIXED       | -0.19 | 2.0  |
| UPC4             | MIXED       | 0.64  | 17.9 |
| UPC5             | MIXED       | -0.07 | 0.6  |
| UPC6             | MIXED       | -0.05 | 0.3  |
| UPC7             | MIXED       | 0.06  | 0.4  |
| B CELLS          | TCMR        | 1.03  | 39.5 |
| CD4 CELLS        | TCMR        | 1.31  | 58.3 |
| CD8 CELLS        | TCMR        | 1.28  | 57.3 |
| CHECK POINT      | TCMR        | 1.23  | 52.1 |
| CHEMOKINES       | TCMR        | 1.03  | 45.9 |
| CYTOKINES        | TCMR        | 0.96  | 36.5 |
| CYTOTOXICITY     | TCMR        | 0.84  | 21.7 |
| ENDOTHELIUM      | TCMR        | 0.10  | 0.6  |
| MACROPHAGES      | TCMR        | 1.16  | 52.3 |
| NK CELLS         | TCMR        | 0.70  | 13.5 |
| PBPC1            | TCMR        | 1.21  | 65.3 |
| PBPC2            | TCMR        | 0.36  | 4.5  |
| PBPC3            | TCMR        | -0.19 | 1.7  |
| PBPC4            | TCMR        | -0.61 | 15.7 |
| PBPC5            | TCMR        | 0.48  | 9.0  |
| PBPC6            | TCMR        | 0.25  | 3.4  |
| PBPC7            | TCMR        | 0.13  | 0.9  |
| PBPC8            | TCMR        | -0.02 | 0.1  |
| PLASMA CELLS     | TCMR        | 0.89  | 28.7 |
| TFHC             | TCMR        | 1.29  | 58.5 |
| TGFB Path        | TCMR        | 0.58  | 14.5 |
| TH1              | TCMR        | 1.25  | 57.1 |
| TH17             | TCMR        | 0.99  | 37.0 |
| TH2              | TCMR        | 1.12  | 34.7 |
| TNF Path         | TCMR        | 0.91  | 31.0 |
| TUBULES          | TCMR        | -0.46 | 9.8  |
| TYPE1 INTERFERON | TCMR        | 0.93  | 31.5 |
| TYPE2 INTERFERON | TCMR        | 1.17  | 59.0 |
| UPC1             | TCMR        | 1.08  | 74.2 |
| UPC2             | TCMR        | 0.15  | 1.1  |
| UPC3             | TCMR        | -0.03 | 0.1  |
| UPC4             | TCMR        | -0.67 | 19.3 |
| UPC5             | TCMR        | -0.09 | 1.0  |
| UPC6             | TCMR        | 0.18  | 1.5  |
| UPC7             | TCMR        | 0.22  | 3.0  |
| B CELLS          | NOREJECTION | -0.15 | 1.4  |
| CD4 CELLS        | NOREJECTION | -0.25 | 3.0  |
| CD8 CELLS        | NOREJECTION | -0.24 | 3.0  |
| CHECK POINT      | NOREJECTION | -0.27 | 3.4  |
| CHEMOKINES       | NOREJECTION | -0.42 | 9.5  |
| CYTOKINES        | NOREJECTION | -0.43 | 8.5  |
| CYTOTOXICITY     | NOREJECTION | -0.30 | 3.4  |
| ENDOTHELIUM      | NOREJECTION | -0.02 | 0.1  |
| MACROPHAGES      | NOREJECTION | -0.27 | 3.9  |

|                  |             |       |       |
|------------------|-------------|-------|-------|
| NK CELLS         | NOREJECTION | -0.59 | 9.9   |
| PBPC1            | NOREJECTION | -0.35 | 7.3   |
| PBPC2            | NOREJECTION | 0.26  | 2.5   |
| PBPC3            | NOREJECTION | -0.09 | 0.5   |
| PBPC4            | NOREJECTION | -0.07 | 0.4   |
| PBPC5            | NOREJECTION | -0.15 | 1.2   |
| PBPC6            | NOREJECTION | 0.28  | 4.1   |
| PBPC7            | NOREJECTION | 0.44  | 7.3   |
| PBPC8            | NOREJECTION | -0.15 | 1.3   |
| PLASMA CELLS     | NOREJECTION | -0.07 | 0.4   |
| TFHC             | NOREJECTION | -0.20 | 2.2   |
| TGFB Path        | NOREJECTION | -0.01 | 0.1   |
| TH1              | NOREJECTION | -0.22 | 2.6   |
| TH17             | NOREJECTION | -0.13 | 1.0   |
| TH2              | NOREJECTION | -0.06 | 0.3   |
| TNF Path         | NOREJECTION | -0.24 | 2.9   |
| TUBULES          | NOREJECTION | 0.16  | 1.6   |
| TYPE1 INTERFERON | NOREJECTION | 0.02  | 0.1   |
| TYPE2 INTERFERON | NOREJECTION | -0.29 | 4.9   |
| UPC1             | NOREJECTION | -0.27 | 6.3   |
| UPC2             | NOREJECTION | 0.28  | 3.2   |
| UPC3             | NOREJECTION | -0.03 | 0.2   |
| UPC4             | NOREJECTION | -0.21 | 2.5   |
| UPC5             | NOREJECTION | -0.59 | 26.3  |
| UPC6             | NOREJECTION | 0.05  | 0.2   |
| UPC7             | NOREJECTION | 0.62  | 19.3  |
| B CELLS          | NORMAL      | -1.07 | 42.2  |
| CD4 CELLS        | NORMAL      | -1.11 | 44.0  |
| CD8 CELLS        | NORMAL      | -1.16 | 48.5  |
| CHECK POINT      | NORMAL      | -1.03 | 38.2  |
| CHEMOKINES       | NORMAL      | -0.95 | 39.9  |
| CYTOKINES        | NORMAL      | -0.87 | 30.2  |
| CYTOTOXICITY     | NORMAL      | -1.88 | 85.9  |
| ENDOTHELIUM      | NORMAL      | -1.52 | 66.4  |
| MACROPHAGES      | NORMAL      | -1.48 | 77.7  |
| NK CELLS         | NORMAL      | -0.97 | 24.6  |
| PBPC1            | NORMAL      | -1.19 | 63.9  |
| PBPC2            | NORMAL      | -0.21 | 1.8   |
| PBPC3            | NORMAL      | -0.29 | 3.4   |
| PBPC4            | NORMAL      | -0.30 | 4.3   |
| PBPC5            | NORMAL      | -0.27 | 3.1   |
| PBPC6            | NORMAL      | -0.49 | 11.4  |
| PBPC7            | NORMAL      | -0.44 | 7.2   |
| PBPC8            | NORMAL      | 1.63  | 80.0  |
| PLASMA CELLS     | NORMAL      | -1.23 | 50.8  |
| TFHC             | NORMAL      | -1.35 | 63.0  |
| TGFB Path        | NORMAL      | -0.87 | 30.6  |
| TH1              | NORMAL      | -1.68 | 90.7  |
| TH17             | NORMAL      | -1.19 | 51.0  |
| TH2              | NORMAL      | -1.74 | 73.3  |
| TNF Path         | NORMAL      | -1.53 | 74.4  |
| TUBULES          | NORMAL      | 1.08  | 45.8  |
| TYPE1 INTERFERON | NORMAL      | -1.45 | 66.9  |
| TYPE2 INTERFERON | NORMAL      | -1.62 | 98.2  |
| UPC1             | NORMAL      | -1.04 | 69.6  |
| UPC2             | NORMAL      | -0.13 | 0.9   |
| UPC3             | NORMAL      | -0.69 | 20.3  |
| UPC4             | NORMAL      | -0.42 | 8.0   |
| UPC5             | NORMAL      | 1.64  | 133.9 |
| UPC6             | NORMAL      | -0.21 | 2.1   |
| UPC7             | NORMAL      | -0.05 | 0.3   |
