# Supplementary material for: In-silico performance, validation, and modeling of the Nanostring Banff Human Organ transplant gene panel using archival data from human kidney transplants
Source: PubMed Central journal article supplement (PMC7977303; doi:10.1186/s12920-021-00891-5), 2021-03-19
Supplement: 12920_2021_891_MOESM4_ESM.pdf [file 12920_2021_891_MOESM4_ESM.pdf]

## SUPPLEMENTAL TABLE 4 BAYESIAN NETWORK

A

### DIAGNOSIS ERROR MATRIX

| DIAGNOSIS (N)     | ABMR (105) | AKI (28)  | MIXED (28) | NOREJECTION (514) | NORMAL (22) | TCMR (67) | Total Errors | % Errors                |
|-------------------|------------|-----------|------------|-------------------|-------------|-----------|--------------|-------------------------|
| ABMR (103)        | 32         | 0         | 5          | 63                | 0           | 3         | 103          | 71 68.9%                |
| AKI (87)          | 3          | 23        | 0          | 52                | 6           | 3         | 87           | 64 73.6%                |
| MIXED (93)        | 16         | 0         | 12         | 38                | 0           | 27        | 93           | 81 87.1%                |
| NOREJECTION (284) | 35         | 2         | 2          | 232               | 3           | 10        | 284          | 52 18.3%                |
| NORMAL (96)       | 5          | 3         | 0          | 75                | 13          | 0         | 96           | 83 86.5%                |
| TCMR (101)        | 14         | 0         | 9          | 54                | 0           | 24        | 101          | 77 76.2%                |
| <b>TOTAL</b>      | <b>105</b> | <b>28</b> | <b>28</b>  | <b>514</b>        | <b>22</b>   | <b>67</b> | <b>764</b>   | <b>428 <u>56.0%</u></b> |

RESAMPLING K FOLD = 10

Mean ROC Index 76.9%

Overall Log-Loss 3.8

B

### CLUSTER ERROR MATRIX

| CLUSTER (N)  | 1 (33)    | 2 (44)    | 3 (170)    | 4 (54)    | 5 (103)    | 6 (23)    | 7 (130)    | 8 (87)    | 9 (120)    | TOTAL ERRORS | % ERRORS                |
|--------------|-----------|-----------|------------|-----------|------------|-----------|------------|-----------|------------|--------------|-------------------------|
| 1 (2)        | 0         | 0         | 0          | 0         | 1          | 0         | 0          | 0         | 1          | 2            | 2 100.0%                |
| 2 (36)       | 1         | 25        | 1          | 0         | 6          | 1         | 2          | 0         | 0          | 36           | 11 30.6%                |
| 3 (251)      | 15        | 2         | 137        | 0         | 15         | 12        | 13         | 21        | 36         | 251          | 114 45.4%               |
| 4 (54)       | 0         | 1         | 0          | 45        | 4          | 0         | 2          | 2         | 0          | 54           | 7 13.0%                 |
| 5 (78)       | 4         | 2         | 0          | 1         | 62         | 0         | 6          | 3         | 0          | 78           | 16 20.5%                |
| 6 (6)        | 0         | 0         | 0          | 0         | 0          | 6         | 0          | 0         | 0          | 6            | 0 0.0%                  |
| 7 (127)      | 0         | 5         | 5          | 8         | 6          | 0         | 95         | 3         | 5          | 127          | 32 25.2%                |
| 8 (86)       | 9         | 0         | 4          | 0         | 8          | 0         | 7          | 55        | 3          | 86           | 31 36.0%                |
| 9 (124)      | 4         | 9         | 23         | 0         | 1          | 4         | 5          | 3         | 75         | 124          | 49 39.5%                |
| <b>TOTAL</b> | <b>33</b> | <b>44</b> | <b>170</b> | <b>54</b> | <b>103</b> | <b>23</b> | <b>130</b> | <b>87</b> | <b>120</b> | <b>764</b>   | <b>262 <u>34.3%</u></b> |

RESAMPLING K FOLD = 10

Mean ROC Index 90.5%

Overall Log-Loss 1.0240
