# Supplementary material for: In-silico performance, validation, and modeling of the Nanostring Banff Human Organ transplant gene panel using archival data from human kidney transplants
Source: PubMed Central journal article supplement (PMC7977303; doi:10.1186/s12920-021-00891-5), 2021-03-19

# SUPPLEMENTAL FIGURE 1

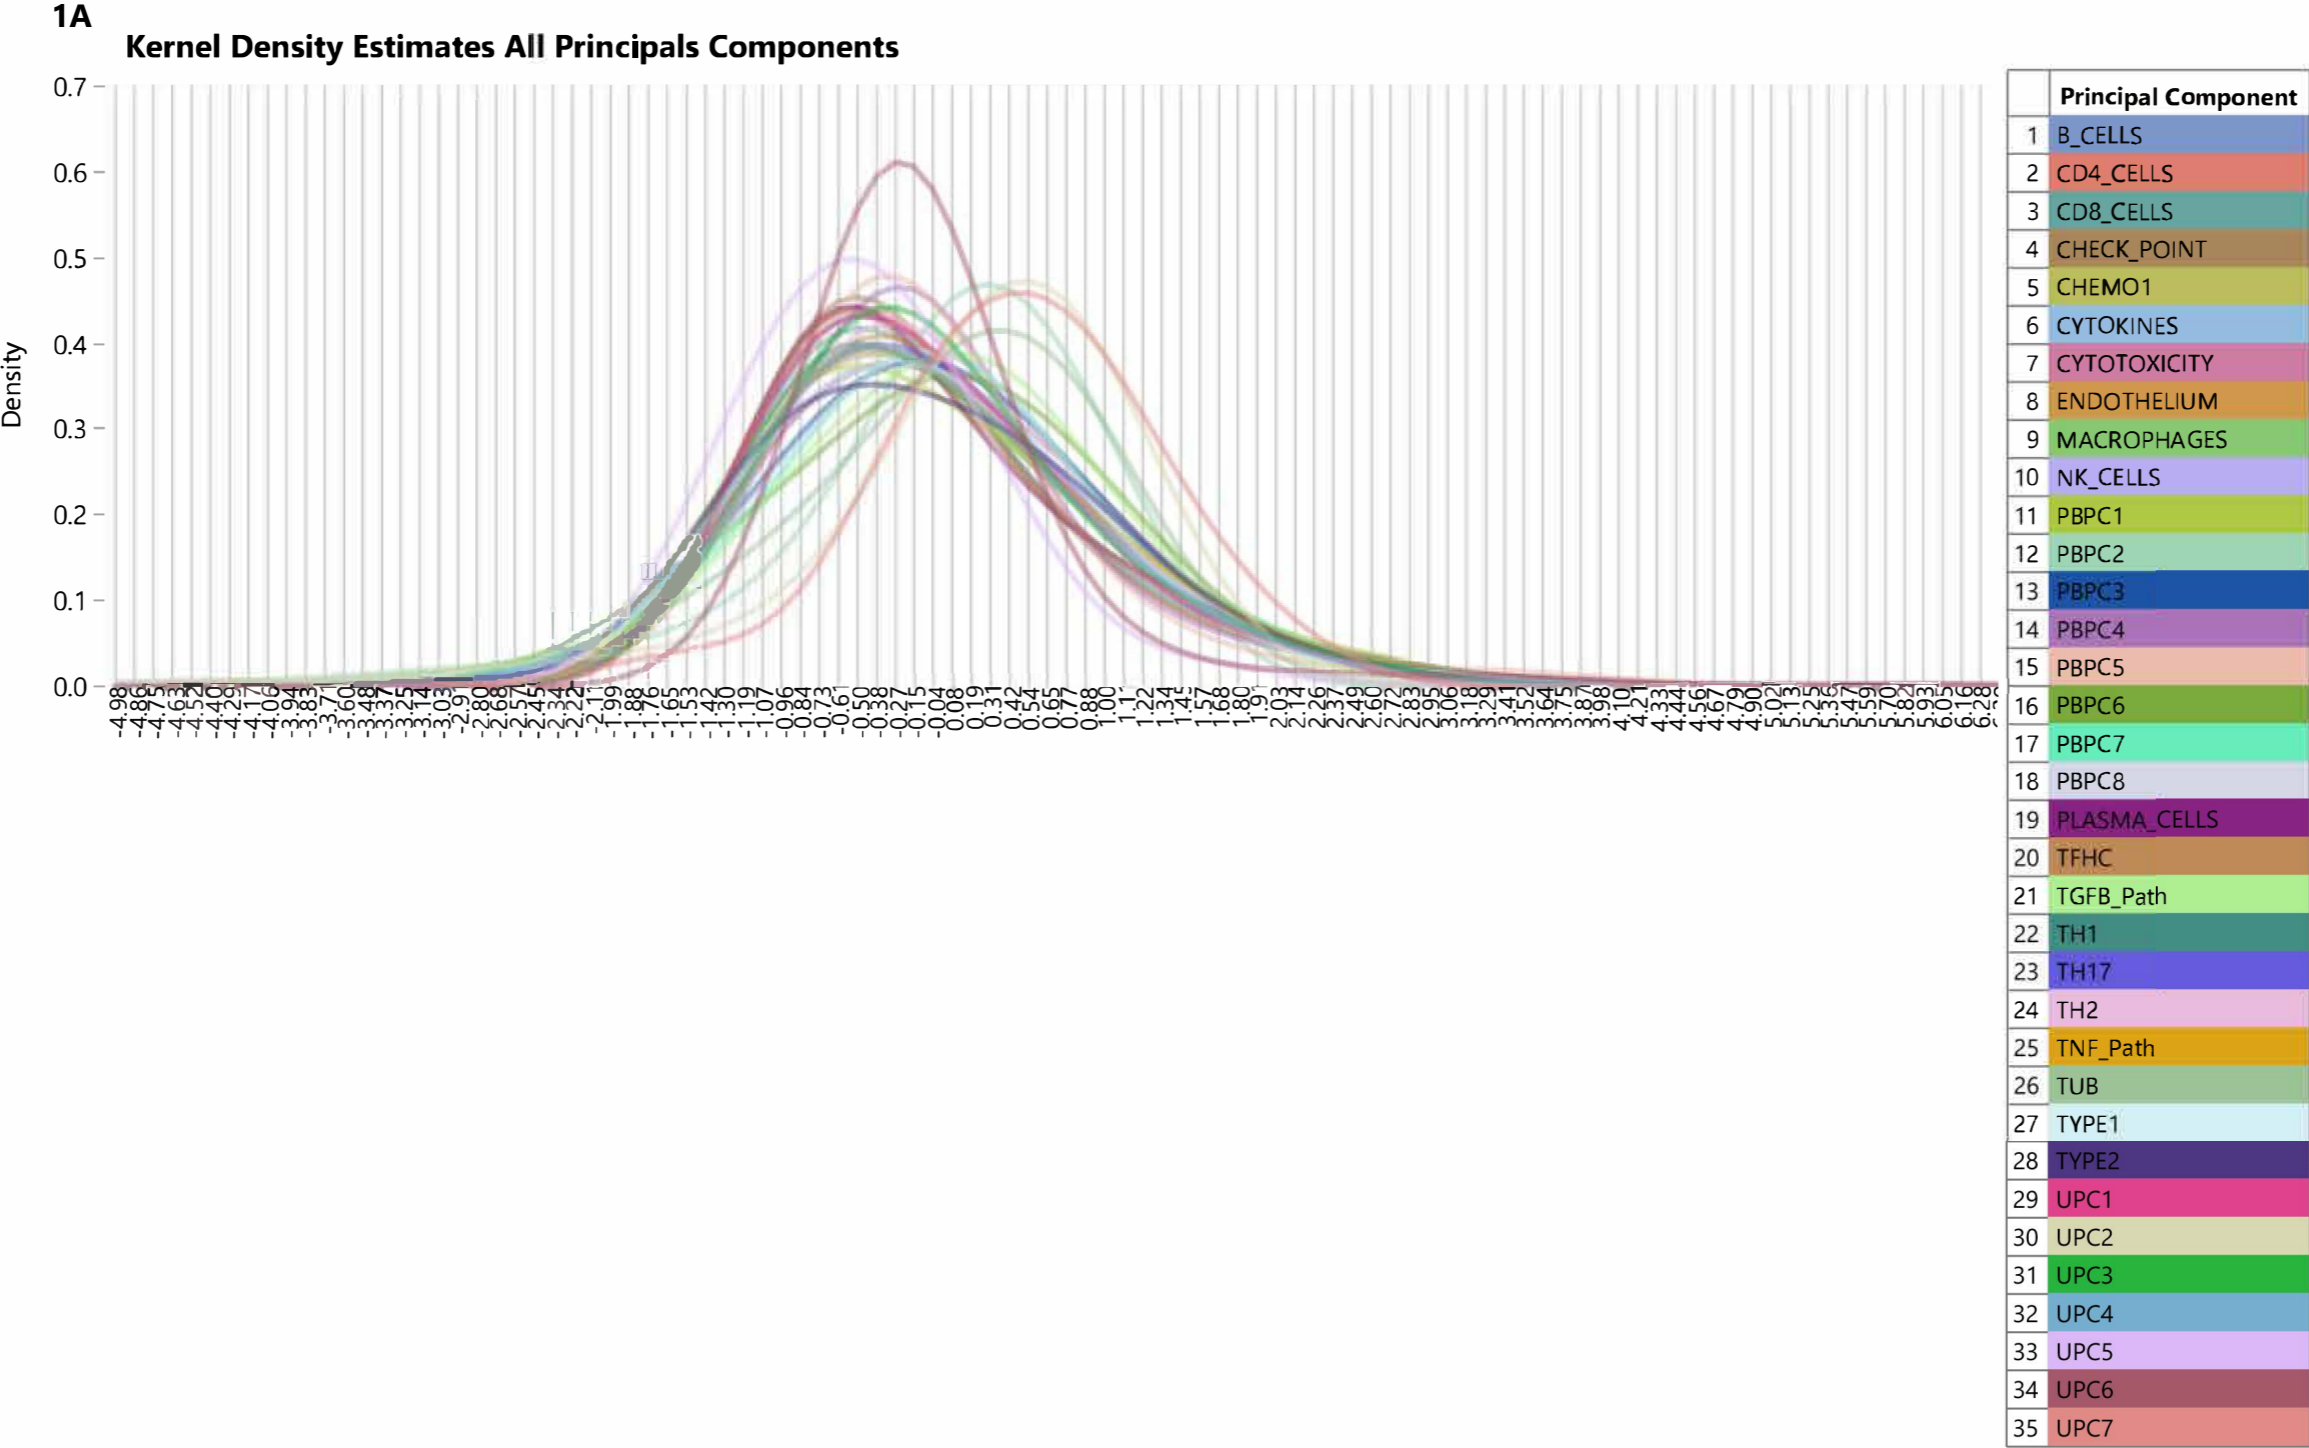

1B

Kernel Density Estimates Pathologically Based Principal Components PBPC

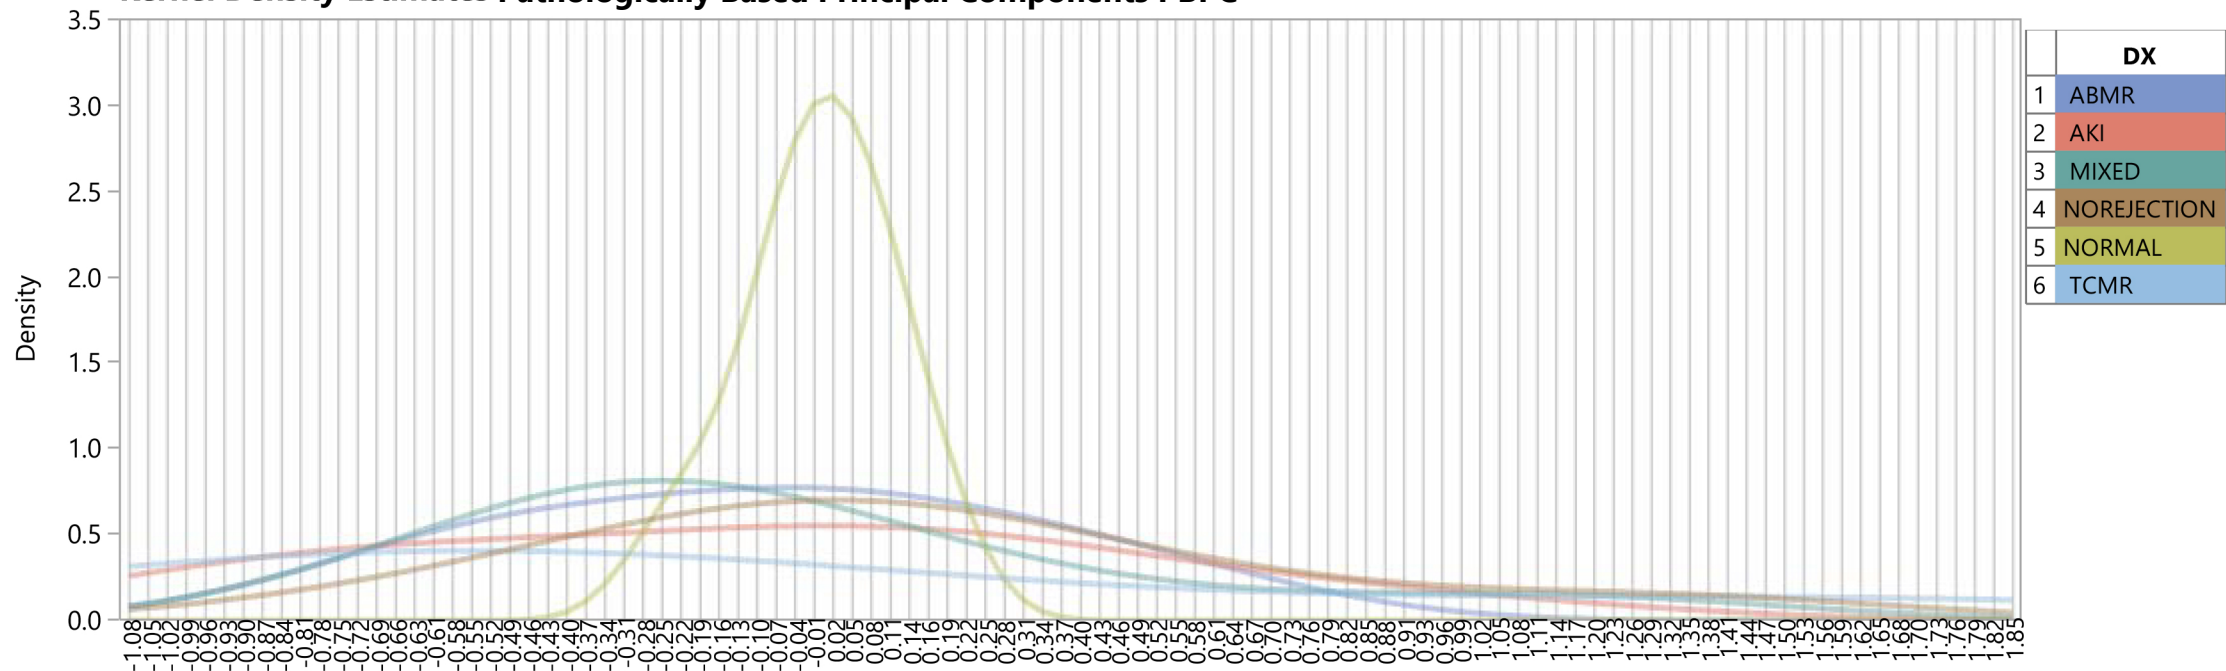

1C

### Kernel Density Estimates Cell Pathways Principal Components CPPC

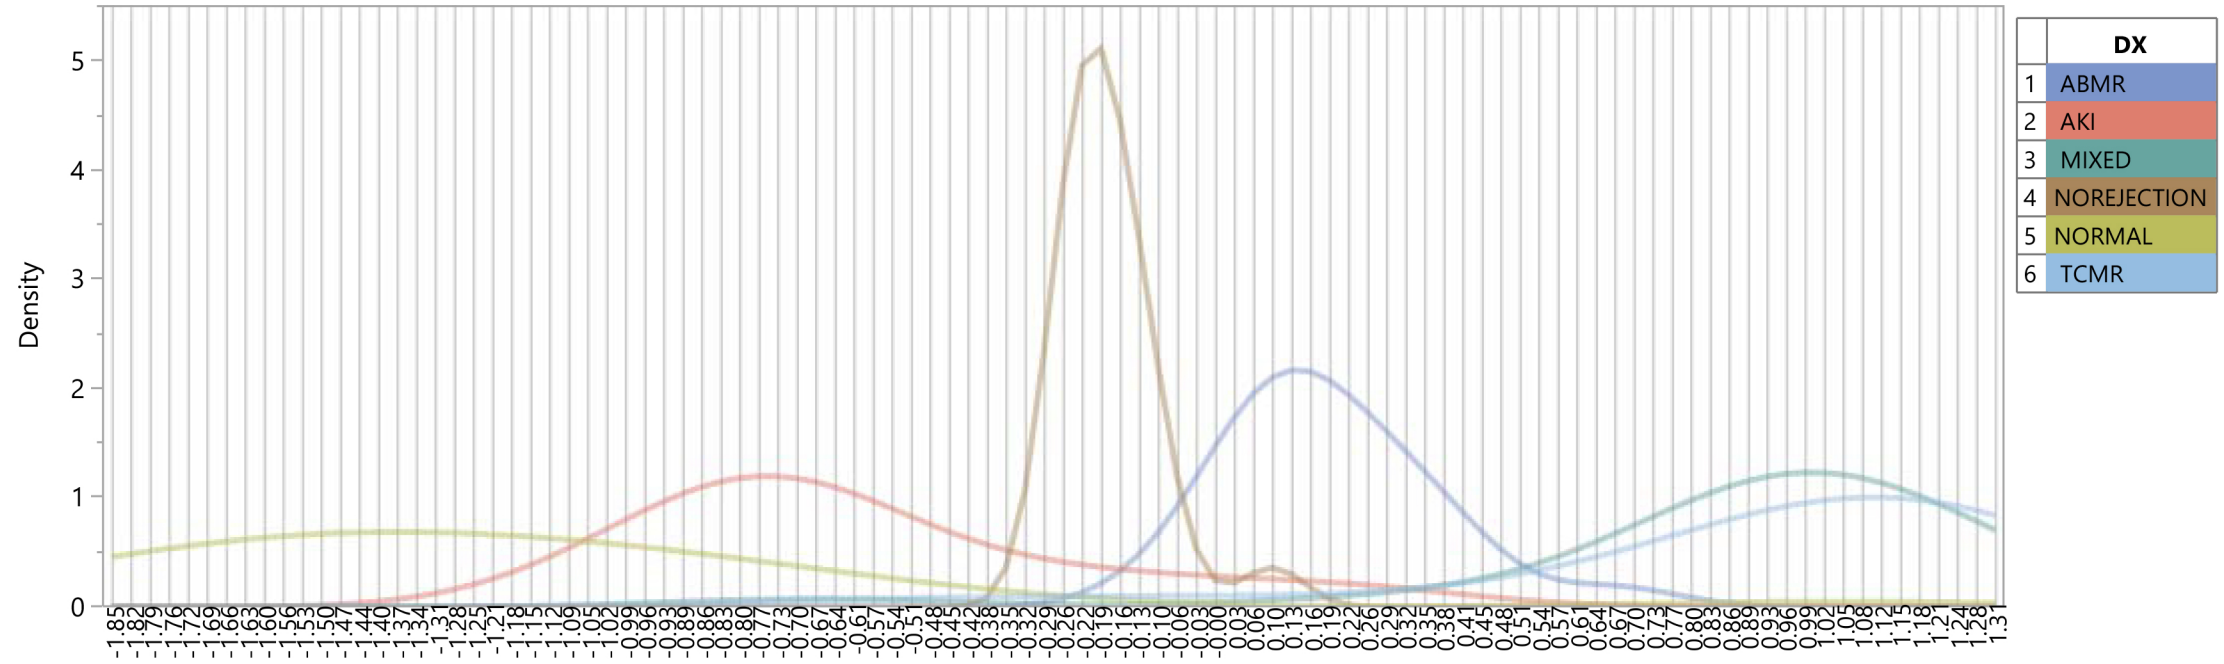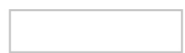

1D

### Kernel Density Estimates Unsupervised Principal Components UPC

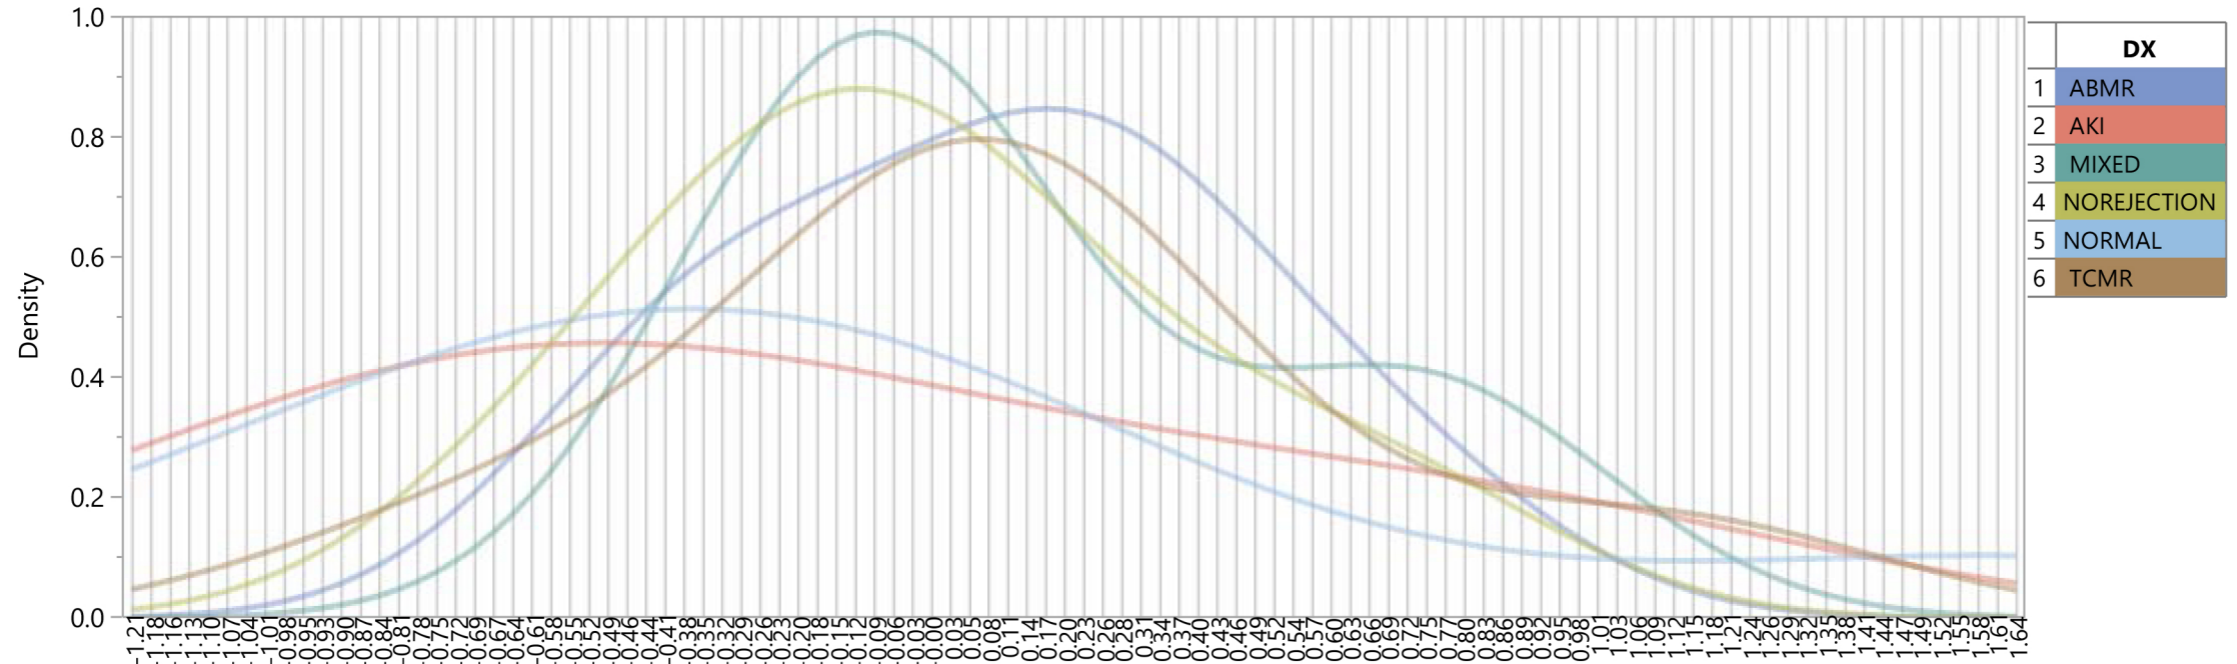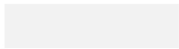

Supplement: 12920_2021_891_MOESM5_ESM.pdf [file 12920_2021_891_MOESM5_ESM.pdf]
